# Supplementary material for: Reviews and syntheses: 210 Pb-derived sediment and carbonaccumulation rates in vegetated coastal ecosystems: setting therecord straight
Source: Copernicus journal article supplement (doi:10.5194/bg-2018-78), 2018-04-10
Supplement: Supplementary file 1 [file bg-2018-78-supplement.zip]

Archive with 2 entries (2 files):
- Supplementary Tables1_7_bg_2018_78.xlsx
- Supplementary material_table captions_bg_2018_78.pdf
