# Supplementary material for: Reviews and syntheses: 210 Pb-derived sediment and carbonaccumulation rates in vegetated coastal ecosystems: setting therecord straight
Source: Copernicus journal article supplement (doi:10.5194/bg-2018-78), 2018-04-10
Supplement: Supplementary file 1 [file bg-2018-78-supplement.zip › Supplementary material_table captions_bg_2018_78.pdf]

## **Supplementary material**

### **Reviews and syntheses: $^{210}\text{Pb}$ -derived sediment and carbon accumulation rates in vegetated coastal ecosystems: setting the record straight**

A. Arias-Ortiz<sup>1\*</sup>, P. Masqué<sup>1,2,3,4</sup>, J. Garcia-Orellana<sup>1,2</sup>, O. Serrano<sup>3</sup>, I. Mazarrasa<sup>5</sup>, N. Marbà<sup>6</sup>, C.E. Lovelock<sup>7</sup>, P. Lavery<sup>3,8</sup> and C.M. Duarte<sup>9</sup>

<sup>1</sup>Institut de Ciència i Tecnologia Ambientals, Universitat Autònoma de Barcelona, Bellaterra, 08193 Barcelona, Spain.

<sup>2</sup>Departament de Física, Universitat Autònoma de Barcelona, Bellaterra, 08193 Barcelona, Spain.

<sup>3</sup>School of Science, Edith Cowan University, 270 Joondalup Drive, Joondalup WA 6027, Australia.

<sup>4</sup>UWA Oceans Institute & School of Physics, The University of Western Australia, 35 Stirling Highway, Crawley 6009, Australia.

<sup>5</sup>Environmental Hydraulics Institute “IH Cantabria”, Universidad de Cantabria, C/ Isabel Torres N°15, Parque Científico y Tecnológico de Cantabria, 39011, Santander, Spain.

<sup>6</sup>Department of Global Change Research. IMEDEA (CSIC-UIB) Institut Mediterrani d'Estudis Avançats, C/ Miguel Marqués 21, 07190 Esporles (Mallorca), Spain.

<sup>7</sup>School of Biological Sciences, The University of Queensland, St Lucia, QLD 4072, Australia.

<sup>8</sup>Centro de Estudios Avanzados de Blanes, Consejo Superior de Investigaciones Científicas. Blanes, Spain 17300.

<sup>9</sup>King Abdullah University of Science and Technology (KAUST), Red Sea Research Center (RSRC), Thuwal, 23955-6900, Saudi Arabia.

*Correspondence to:* Ariane Arias-Ortiz (ariane.arias@uab.cat)

#### **Table captions**

##### **Table 1a. Ideal excess $^{210}\text{Pb}$ concentration profile simulated for seagrass sediments.**

Considering a constant flux of excess  $^{210}\text{Pb}$   $\Phi = 120 \text{ Bq m}^{-2} \text{ yr}^{-1}$ , DBD =  $1.03 \text{ g cm}^{-3}$  and a constant mass accumulation rate  $\text{MAR} = 0.2 \text{ g cm}^{-2} \text{ yr}^{-1}$ .

**Table 1b. Ideal excess  $^{210}\text{Pb}$  concentration profile simulated for mangrove/tidal marsh sediments.** Considering a constant flux of excess  $^{210}\text{Pb}$   $\Phi = 120 \text{ Bq m}^{-2} \text{ yr}^{-1}$ , DBD =  $0.4 \text{ g cm}^{-3}$  and a constant mass accumulation rate  $\text{MAR} = 0.3 \text{ g cm}^{-2} \text{ yr}^{-1}$ .

##### **Table 2a. Simulation outputs for mixing scenarios A, B and C in seagrass sediments.**

Considering flux of excess  $^{210}\text{Pb}$  into sediment  $\Phi = 120 \text{ Bq m}^{-2} \text{ yr}^{-1}$ , DBD:  $1.03 \text{ g cm}^{-3}$ . Excess  $^{210}\text{Pb}$  concentrations in bold were used to run CF:CS and CRS models.

**Table 2b. Simulation outputs for mixing scenarios A, B and C in mangrove/tidal marsh sediments.** Considering a constant flux of excess  $^{210}\text{Pb}$  into sediment  $\Phi = 120 \text{ Bq m}^{-2} \text{ yr}^{-1}$ , DBD:  $0.4 \text{ g cm}^{-3}$ . Excess  $^{210}\text{Pb}$  concentrations in bold were used to run CF:CS and CRS models.

**Table 3a. Simulation outputs for increasing sedimentation (scenarios D, E, F and G) in seagrass sediments.** Considering a constant flux of excess  $^{210}\text{Pb}$  of  $\Phi = 120 \text{ Bq m}^{-2} \text{ yr}^{-1}$ , DBD:  $1.03 \text{ g cm}^{-3}$  and increasing mass accumulation rates (MAR) (20%, 50%, 200% ad 300%).

**Table 3b. Simulation outputs for increasing sedimentation (scenarios D, E, F and G) in mangrove/tidal marsh sediments.** Considering a constant flux of excess  $^{210}\text{Pb}$  of  $\Phi = 120 \text{ Bq m}^{-2} \text{ yr}^{-1}$ , DBD:  $0.4 \text{ g cm}^{-3}$  and increasing mass accumulation rates (MAR) (20%, 50%, 200% ad 300%).

**Table 4a. Simulation outputs of erosion scenarios (H, J and K) in seagrass sediments.** Considering a constant flux of excess  $^{210}\text{Pb}$  of  $\Phi = 120 \text{ Bq m}^{-2} \text{ yr}^{-1}$  and DBD:  $1.03 \text{ g cm}^{-3}$ . Excess  $^{210}\text{Pb}$  concentrations in bold were used to run CF:CS and CRS models.

**Table 4b. Simulation outputs of erosion scenarios (H, J and K) in mangrove/tidal marsh sediments.** Considering a constant flux of excess  $^{210}\text{Pb}$  of  $\Phi = 120 \text{ Bq m}^{-2} \text{ yr}^{-1}$  and DBD:  $0.4 \text{ g cm}^{-3}$ . Excess  $^{210}\text{Pb}$  concentrations in bold were used to run CF:CS and CRS models.

**Table 5a. Simulation outputs of excess  $^{210}\text{Pb}$  concentrations diluted by coarse grains size sediment composition in seagrass sediments (scenario K).** Considering a mean MAR =  $0.2 \text{ g cm}^{-2} \text{ yr}^{-1}$ , mean specific surface area of the bulk sediment of  $S_{\text{mean}} = 0.007 \text{ m}^2 \text{ g}^{-1}$  and a DBD =  $1.03 \text{ g cm}^{-3}$  that in this case is estimated as the weighted average of the DBD of the two mixed grain size fractions.

**Table 5b. Simulation outputs of excess  $^{210}\text{Pb}$  concentrations diluted by coarse grains size sediment composition in mangrove/tidal marsh sediments (scenario K).** Considering a mean MAR =  $0.3 \text{ g cm}^{-2} \text{ yr}^{-1}$ , mean specific surface area of the bulk sediment of  $0.007 \text{ m}^2 \text{ g}^{-1}$  and a DBD of  $1.03 \text{ g cm}^{-3}$  that is estimated as the weighted average of the DBD of the two mixed grain size fractions.

**Table 6a. Simulation outputs of excess  $^{210}\text{Pb}$  concentrations as a function of varying grain size distribution with depth in seagrass sediments.** To estimate initial excess  $^{210}\text{Pb}$  concentrations we consider MAR =  $0.2 \text{ g cm}^{-2}$  and constant excess  $^{210}\text{Pb}$  flux of  $\Phi = 120 \text{ Bq m}^{-2} \text{ yr}^{-1}$ . Specific surface areas ( $S_{\text{sp}}$ ) =  $2.05 \text{ m}^2 \text{ g}^{-1}$  and  $0.023 \text{ m}^2 \text{ g}^{-1}$  for clay and medium sand, respectively.

**Table 6b. Simulation outputs of excess  $^{210}\text{Pb}$  concentrations as a function of varying grain size distribution with depth in mangrove/tidal marsh sediments.** To estimate initial excess  $^{210}\text{Pb}$  concentrations we consider MAR =  $0.3 \text{ g cm}^{-2}$  and constant excess  $^{210}\text{Pb}$  flux of  $\Phi = 120 \text{ Bq m}^{-2} \text{ yr}^{-1}$ . Specific surface areas ( $S_{\text{sp}}$ ) =  $2.05 \text{ m}^2 \text{ g}^{-1}$  and  $0.023 \text{ m}^2 \text{ g}^{-1}$  for clay and medium sand, respectively.

**Table 7a. Simulation outputs of excess  $^{210}\text{Pb}$  concentrations enriched by organic matter decay (scenarios N to S) in seagrass sediments.** Considering a constant flux excess  $^{210}\text{Pb}$  flux of  $\Phi = 120 \text{ Bq m}^{-2} \text{ yr}^{-1}$ , initial DBD =  $1.03 \text{ g cm}^{-2}$ , MAR =  $0.2 \text{ g cm}^{-2} \text{ yr}^{-1}$  and initial organic matter content of 16.5% and 65%. Organic matter decay rates  $k_s = 0.00005 \text{ d}^{-1}$ ,  $k_{\text{ox}} = 0.0005 \text{ d}^{-1}$  and  $k_{\text{lb}} = 0.01 \text{ d}^{-1}$ .

**Table 7b. Simulation outputs of excess  $^{210}\text{Pb}$  concentrations enriched by organic matter decay (scenarios N to S) in mangrove/tidal marsh sediments.** Considering a constant flux excess  $^{210}\text{Pb}$  flux of  $\Phi = 120 \text{ Bq m}^{-2} \text{ yr}^{-1}$ , initial DBD =  $0.4 \text{ g cm}^{-2}$ , MAR =  $0.3 \text{ g cm}^{-2} \text{ yr}^{-1}$  and

initial organic matter content of 16.5% and 65%. Organic matter decay rates  $k_s = 0.00005 \text{ d}^{-1}$ ,  $k_{ox} = 0.0005 \text{ d}^{-1}$  and  $k_{lb} = 0.03 \text{ d}^{-1}$ .
