# Supplementary material for: Reviews and syntheses: 210 Pb-derived sediment and carbonaccumulation rates in vegetated coastal ecosystems: setting therecord straight
Source: Copernicus journal article supplement (doi:10.5194/bg-2018-78), 2018-04-10
Supplement: Supplementary file 1 [file Supplementary Tables1_7_bg_2018_78.xlsx]

## Sheet: Info
Supplementary Information
Reviews and syntheses: 210Pb-derived sediment and carbon accumulation rates in vegetated coastal ecosystems: setting the record straight
A. Arias-Ortiz1*, P. Masqué1,2,3,4, J. Garcia-Orellana1,2, O. Serrano3, I. Mazarrasa5, N. Marbà6, C.E. Lovelock7, P. Lavery3,8 and C.M. Duarte9
1Institut de Ciència i Tecnologia Ambientals, Universitat Autònoma de Barcelona, Bellaterra, 08193 Barcelona, Spain.
2Departament de Física, Universitat Autònoma de Barcelona, Bellaterra, 08193 Barcelona, Spain.
3School of Science, Edith Cowan University, 270 Joondalup Drive, Joondalup WA 6027, Australia.
4UWA Oceans Institute & School of Physics, The University of Western Australia, 35 Stirling Highway, Crawley 6009, Australia.
5Environmental Hydraulics Institute “IH Cantabria”, Universidad de Cantabria, C/ Isabel Torres N◦15, Parque Científico y Tecnológico de Cantabria, 39011, Santander, Spain.
6Department of Global Change Research. IMEDEA (CSIC-UIB) Institut Mediterrani d’Estudis Avançats, C/ Miguel Marqués 21, 07190 Esporles (Mallorca), Spain.
7School of Biological Sciences, The University of Queensland, St Lucia, QLD 4072, Australia.
8Centro de Estudios Avanzados de Blanes, Consejo Superior de Investigaciones Científicas. Blanes, Spain 17300.
9King Abdullah University of Science and Technology (KAUST), Red Sea Research Center (RSRC), Thuwal, 23955-6900, Saudi Arabia.
Correspondence to: Ariane Arias-Ortiz (ariane.arias@uab.cat)

## Sheet: Table 1a
Table 1a. Ideal excess 210Pb concentration profile simulated for seagrass sediments. Considering a constant flux of excess 210Pb Φ = 120 Bq m-2 yr-1, DBD = 1.03 g cm-3 and a constant mass accumulation rate MAR = 0.2 g cm-2 yr-1.
Depth (z)	DBD	Cum. Mass (m)	Cum. Mass at center of the section	Excess 210Pb (Am)	Excess 210Pb (Cm)	Corg-MAR															Depth (cm)	DBD	massa accumulada	massa accumulada	Excess available total (bulk)	excess 210Pb	CF:CS	16.5% initial OM content			65% initial OM content
cm	g cm-3	g cm-2	g cm-2	Bq m-2	Bq kg-1	gCorg m-2 yr-1															cm	g cm-3	g cm-2	g cm-2	Bq/m2	Bq kg-1	year BP	decaying at 0.182 yr-1	0.5 is oxic	0.5 is labile	decaying at 0.182 yr-1	0.5 is oxic	0.5 is labile
1	1.03	1.03	0.515	571.034	55.4402	50															1	1.03	1.03	0.515	571.034	55.4402	2.57268	62.0187	51.3318	31.0121
2	1.03	2.06	1.545	486.566	47.2394																2	1.03	2.06	1.545	486.566	47.2394	7.71805	56.46	36.1762	28.23
3	1.03	3.09	2.575	414.593	40.2517																3	1.03	3.09	2.575	414.593	40.2517	12.8634	51.3996	28.8068	25.6998
4	1.03	4.12	3.605	353.265	34.2976																4	1.03	4.12	3.605	353.265	34.2976	18.0088	46.7927	24.6112	23.3963
5	1.03	5.15	4.635	301.01	29.2243																5	1.03	5.15	4.635	301.01	29.2243	23.1541	42.5987	21.7744	21.2994
6	1.03	6.18	5.665	256.484	24.9014																6	1.03	6.18	5.665	256.484	24.9014	28.2995	38.7806	19.5761	19.3903
7	1.03	7.21	6.695	218.545	21.2179																7	1.03	7.21	6.695	218.545	21.2179	33.4449	35.3048	17.725	17.6524
8	1.03	8.24	7.725	186.217	18.0793																8	1.03	8.24	7.725	186.217	18.0793	38.5902	32.1405	16.0986	16.0702
9	1.03	9.27	8.755	158.672	15.405																9	1.03	9.27	8.755	158.672	15.405	43.7356	29.2597	14.641	14.6299
10	1.03	10.3	9.785	135.201	13.1263																10	1.03	10.3	9.785	135.201	13.1263	48.881	26.6372	13.323	13.3186
11	1.03	11.33	10.815	115.202	11.1846																11	1.03	11.33	10.815	115.202	11.1846	54.0263	24.2498	12.1266	12.1249
12	1.03	12.36	11.845	98.1608	9.53018																12	1.03	12.36	11.845	98.1608	9.53018	59.1717	22.0763	11.0388	11.0381
13	1.03	13.39	12.875	83.6407	8.12046																13	1.03	13.39	12.875	83.6407	8.12046	64.3171	20.0976	10.0491	10.0488
14	1.03	14.42	13.905	71.2685	6.91927																14	1.03	14.42	13.905	71.2685	6.91927	69.4624	18.2963	9.14824	9.14814
15	1.03	15.45	14.935	60.7263	5.89576																15	1.03	15.45	14.935	60.7263	5.89576	74.6078	16.6564	8.32824	8.3282
16	1.03	16.48	15.965	51.7436	5.02365																16	1.03	16.48	15.965	51.7436	5.02365	79.7532	15.1635	7.58177	7.58176
17	1.03	17.51	16.995	44.0896	4.28054																17	1.03	17.51	16.995	44.0896	4.28054	84.8985	13.8044	6.90222	6.90221
18	1.03	18.54	18.025	37.5678	3.64736																18	1.03	18.54	18.025	37.5678	3.64736	90.0439	12.5672	6.28358	6.28358
19	1.03	19.57	19.055	32.0107	3.10784																19	1.03	19.57	19.055	32.0107	3.10784	95.1892	11.4408	5.72039	5.72039
20	1.03	20.6	20.085	27.2756	2.64812																20	1.03	20.6	20.085	27.2756	2.64812	100.335	10.4153	5.20767	5.20767
21	1.03	21.63	21.115	23.241	2.25641																21	1.03	21.63	21.115	23.241	2.25641	105.48	9.48183	4.74092	4.74092
22	1.03	22.66	22.145	19.8032	1.92264																22	1.03	22.66	22.145	19.8032	1.92264	110.625	8.63199	4.31599	4.31599
23	1.03	23.69	23.175	16.8738	1.63824																23	1.03	23.69	23.175	16.8738	1.63824	115.771	7.85831	3.92916	3.92916
24	1.03	24.72	24.205	14.3778	1.39591																24	1.03	24.72	24.205	14.3778	1.39591	120.916	7.15398	3.57699	3.57699
25	1.03	25.75	25.235	12.251	1.18942																25	1.03	25.75	25.235	12.251	1.18942	126.061	6.51278	3.25639	3.25639
26	1.03	26.78	26.265	10.4389	1.01348																26	1.03	26.78	26.265	10.4389	1.01348	131.207	5.92904	2.96452	2.96452
27	1.03	27.81	27.295	8.89472	0.863565																27	1.03	27.81	27.295	8.89472	0.863565	136.352	5.39763	2.69882	2.69882
28	1.03	28.84	28.325	7.579	0.735825																28	1.03	28.84	28.325	7.579	0.735825	141.498	4.91385	2.45692	2.45692
29	1.03	29.87	29.355	6.45791	0.626981																29	1.03	29.87	29.355	6.45791	0.626981	146.643	4.47343	2.23671	2.23671
30	1.03	30.9	30.385	5.50264	0.534237																30	1.03	30.9	30.385	5.50264	0.534237	151.788	4.07248	2.03624	2.03624
																											Promedio	21.6862	11.9554	10.8432

## Sheet: Table 1b
Table 1b. Ideal excess 210Pb concentration profile simulated for mangrove/tidal marsh sediments. Considering a constant flux of excess 210Pb Φ = 120 Bq m-2 yr-1, DBD = 0.4 g cm-3 and a constant mass accumulation rate MAR = 0.3 g cm-2 yr-1.
Depth (z)	DBD	Cum. Mass (m)	Cum. Mass at center of the section	Excess 210Pb (Am)	Excess 210Pb (Cm)	Corg-MAR
cm	g cm-3	g cm-2	g cm-2	Bq m-2	Bq kg-1	gCorg m-2 yr-1
1	0.4	0.4	0.2	156.727	39.1818	240
2	0.4	0.8	0.6	150.364	37.5911
3	0.4	1.2	1	144.26	36.065
4	0.4	1.6	1.4	138.404	34.6009
5	0.4	2	1.8	132.785	33.1962
6	0.4	2.4	2.2	127.394	31.8486
7	0.4	2.8	2.6	122.222	30.5556
8	0.4	3.2	3	117.261	29.3152
9	0.4	3.6	3.4	112.5	28.1251
10	0.4	4	3.8	107.933	26.9833
11	0.4	4.4	4.2	103.551	25.8878
12	0.4	4.8	4.6	99.3475	24.8369
13	0.4	5.2	5	95.3143	23.8286
14	0.4	5.6	5.4	91.4449	22.8612
15	0.4	6	5.8	87.7325	21.9331
16	0.4	6.4	6.2	84.1709	21.0427
17	0.4	6.8	6.6	80.7538	20.1885
18	0.4	7.2	7	77.4755	19.3689
19	0.4	7.6	7.4	74.3302	18.5826
20	0.4	8	7.8	71.3126	17.8282
21	0.4	8.4	8.2	68.4176	17.1044
22	0.4	8.8	8.6	65.6401	16.41
23	0.4	9.2	9	62.9753	15.7438
24	0.4	9.6	9.4	60.4187	15.1047
25	0.4	10	9.8	57.9659	14.4915
26	0.4	10.4	10.2	55.6127	13.9032
27	0.4	10.8	10.6	53.355	13.3387
28	0.4	11.2	11	51.1889	12.7972
29	0.4	11.6	11.4	49.1108	12.2777
30	0.4	12	11.8	47.1171	11.7793
31	0.4	12.4	12.2	45.2043	11.3011
32	0.4	12.8	12.6	43.3692	10.8423
33	0.4	13.2	13	41.6085	10.4021
34	0.4	13.6	13.4	39.9193	9.97983
35	0.4	14	13.8	38.2987	9.57469
36	0.4	14.4	14.2	36.7439	9.18598
37	0.4	14.8	14.6	35.2523	8.81306
38	0.4	15.2	15	33.8211	8.45528
39	0.4	15.6	15.4	32.4481	8.11203
40	0.4	16	15.8	31.1308	7.7827
41	0.4	16.4	16.2	29.867	7.46675
42	0.4	16.8	16.6	28.6545	7.16363
43	0.4	17.2	17	27.4912	6.87281
44	0.4	17.6	17.4	26.3752	6.59379
45	0.4	18	17.8	25.3044	6.32611
46	0.4	18.4	18.2	24.2771	6.06929
47	0.4	18.8	18.6	23.2916	5.82289
48	0.4	19.2	19	22.346	5.5865
49	0.4	19.6	19.4	21.4388	5.35971
50	0.4	20	19.8	20.5685	5.14212
51	0.4	20.4	20.2	19.7335	4.93337
52	0.4	20.8	20.6	18.9324	4.73309
53	0.4	21.2	21	18.1638	4.54094
54	0.4	21.6	21.4	17.4264	4.3566
55	0.4	22	21.8	16.7189	4.17973
56	0.4	22.4	22.2	16.0402	4.01005
57	0.4	22.8	22.6	15.389	3.84725
58	0.4	23.2	23	14.7643	3.69107
59	0.4	23.6	23.4	14.1649	3.54122
60	0.4	24	23.8	13.5898	3.39746
61	0.4	24.4	24.2	13.0381	3.25953
62	0.4	24.8	24.6	12.5088	3.12721
63	0.4	25.2	25	12.001	3.00025
64	0.4	25.6	25.4	11.5138	2.87845
65	0.4	26	25.8	11.0464	2.7616
66	0.4	26.4	26.2	10.5979	2.64949
67	0.4	26.8	26.6	10.1677	2.54193
68	0.4	27.2	27	9.75493	2.43873
69	0.4	27.6	27.4	9.35891	2.33973
70	0.4	28	27.8	8.97897	2.24474
71	0.4	28.4	28.2	8.61445	2.15361
72	0.4	28.8	28.6	8.26473	2.06618
73	0.4	29.2	29	7.92921	1.9823
74	0.4	29.6	29.4	7.60731	1.90183
75	0.4	30	29.8	7.29848	1.82462
76	0.4	30.4	30.2	7.00218	1.75055
77	0.4	30.8	30.6	6.71792	1.67948
78	0.4	31.2	31	6.44519	1.6113
79	0.4	31.6	31.4	6.18354	1.54588
80	0.4	32	31.8	5.93251	1.48313
81	0.4	32.4	32.2	5.69167	1.42292
82	0.4	32.8	32.6	5.4606	1.36515
83	0.4	33.2	33	5.23892	1.30973
84	0.4	33.6	33.4	5.02624	1.25656
85	0.4	34	33.8	4.82219	1.20555
86	0.4	34.4	34.2	4.62642	1.15661
87	0.4	34.8	34.6	4.43861	1.10965
88	0.4	35.2	35	4.25841	1.0646
89	0.4	35.6	35.4	4.08554	1.02138
90	0.4	36	35.8	3.91968	0.979919
91	0.4	36.4	36.2	3.76055	0.940138
92	0.4	36.8	36.6	3.60789	0.901971
93	0.4	37.2	37	3.46142	0.865354
94	0.4	37.6	37.4	3.32089	0.830224
95	0.4	38	37.8	3.18608	0.796519
96	0.4	38.4	38.2	3.05673	0.764183
97	0.4	38.8	38.6	2.93264	0.73316
98	0.4	39.2	39	2.81358	0.703396
99	0.4	39.6	39.4	2.69936	0.67484
100	0.4	40	39.8	2.58978	0.647444
101	0.4	40.4	40.2	2.48464	0.62116
102	0.4	40.8	40.6	2.38377	0.595943
103	0.4	41.2	41	2.287	0.57175
104	0.4	41.6	41.4	2.19415	0.548538
105	0.4	42	41.8	2.10508	0.52627
106	0.4	42.4	42.2	2.01962	0.504905
107	0.4	42.8	42.6	1.93763	0.484407
108	0.4	43.2	43	1.85897	0.464742
109	0.4	43.6	43.4	1.7835	0.445875
110	0.4	44	43.8	1.7111	0.427774
111	0.4	44.4	44.2	1.64163	0.410408
112	0.4	44.8	44.6	1.57499	0.393746

## Sheet: Table 2a
Table 2a. Simulation outputs for mixing scenarios A, B and C in seagrass sediments. Considering flux of excess 210Pb into sediment Φ = 120 Bq m-2 yr-1, DBD: 1.03 g cm-3. Excess 210Pb concentrations in bold were used to run CF:CS and CRS models.
				Mixing A			Mixing B			Mixing C
Depth (z)	Cum. Mass (m)	Cum. Mass center	210Pbex (A)	Mixed 210Pbex (A)	210Pbex (C)	Smoothed 210Pbex	Mixed 210Pbex (A)	210Pbex (C)	Smoothed 210Pbex	Mixed Excess 210Pb (A)	210Pbex (C)	Smoothed 210Pbex
cm	g cm-2	g cm-2	Bq m-2	Bq m-2	Bq kg-1	Bq kg-1	Bq m-2	Bq kg-1	Bq kg-1	Bq m-2	Bq kg-1	Bq kg-1
1	1.03	0.515	571.034	450.476	43.7355	41.4718	447.728	43.4687	44.3996	571.034	55.4402	51.3398
2	2.06	1.545	486.566	403.842	39.208	42.0452	466.903	45.3304	43.1585	486.566	47.2394	47.6438
3	3.09	2.575	414.593	444.88	43.1922	40.1135	418.966	40.6763	41.6692	414.593	40.2517	40.5963
4	4.12	3.605	353.265	390.785	37.9403	41.1699	401.709	39.0009	39.2181	353.265	34.2976	29.6587
5	5.15	4.635	301.01	436.486	42.3772	35.073	391.163	37.977	33.9597	148.596	14.4268	23.4548
6	6.18	5.665	256.484	256.484	24.9014	29.4988	256.484	24.9014	28.0321	222.893	21.6401	18.5624
7	7.21	6.695	218.545	218.545	21.2179	21.3995	218.545	21.2179	21.3995	202.09	19.6204	20.2616
8	8.24	7.725	186.217	186.217	18.0793	18.2341	186.217	18.0793	18.2341	201.099	19.5242	20.8707
9	9.27	8.755	158.672	158.672	15.405	15.5369	158.672	15.405	15.5369	241.715	23.4675	22.089
10	10.3	9.785	135.201	135.201	13.1263	13.2386	135.201	13.1263	13.2386	239.734	23.2752	19.3091
11	11.33	10.815	115.202	115.202	11.1846	11.2804	115.202	11.1846	11.2804	115.202	11.1846	14.6633
12	12.36	11.845	98.1608	98.1608	9.53018	9.61175	98.1608	9.53018	9.61175	98.1608	9.53018	9.61175
13	13.39	12.875	83.6407	83.6407	8.12046	8.18997	83.6407	8.12046	8.18997	83.6407	8.12046	8.18997
14	14.42	13.905	71.2685	71.2685	6.91927	6.9785	71.2685	6.91927	6.9785	71.2685	6.91927	6.9785
15	15.45	14.935	60.7263	60.7263	5.89576	5.94623	60.7263	5.89576	5.94623	60.7263	5.89576	5.94623
16	16.48	15.965	51.7436	51.7436	5.02365	5.06665	51.7436	5.02365	5.06665	51.7436	5.02365	5.06665
17	17.51	16.995	44.0896	44.0896	4.28054	4.31718	44.0896	4.28054	4.31718	44.0896	4.28054	4.31718
18	18.54	18.025	37.5678	37.5678	3.64736	3.67858	37.5678	3.64736	3.67858	37.5678	3.64736	3.67858
19	19.57	19.055	32.0107	32.0107	3.10784	3.13444	32.0107	3.10784	3.13444	32.0107	3.10784	3.13444
20	20.6	20.085	27.2756	27.2756	2.64812	2.67079	27.2756	2.64812	2.67079	27.2756	2.64812	2.67079
21	21.63	21.115	23.241	23.241	2.25641	2.45226	23.241	2.25641	2.45226	23.241	2.25641	2.45226
22	22.66	22.145	19.8032	19.8032	1.92264	2.08952	19.8032	1.92264	2.08952	19.8032	1.92264	2.08952
23	23.69	23.175	16.8738	16.8738	1.63824	1.78044	16.8738	1.63824	1.78044	16.8738	1.63824	1.78044
24	24.72	24.205	14.3778	14.3778	1.39591	1.51707	14.3778	1.39591	1.51707	14.3778	1.39591	1.51707
25	25.75	25.235	12.251	12.251	1.18942	1.29266	12.251	1.18942	1.29266	12.251	1.18942	1.29266
26	26.78	26.265	10.4389	10.4389	1.01348	1.10145	10.4389	1.01348	1.10145	10.4389	1.01348	1.10145
27	27.81	27.295	8.89472	8.89472	0.863565	0.938523	8.89472	0.863565	0.938523	8.89472	0.863565	0.938523
28	28.84	28.325	7.579	7.579	0.735825	0.799695	7.579	0.735825	0.799695	7.579	0.735825	0.799695
29	29.87	29.355	6.45791	6.45791	0.626981	0.681403	6.45791	0.626981	0.681403	6.45791	0.626981	0.681403
30	30.9	30.385	5.50264	5.50264	0.534237	0.580609	5.50264	0.534237	0.580609	5.50264	0.534237	0.580609

## Sheet: Table 2b
Table 2b. Simulation outputs for mixing scenarios A, B and C in mangrove/tidal marsh sediments. Considering a constant flux of excess 210Pb into sediment Φ = 120 Bq m-2 yr-1, DBD: 0.4. g cm-3. Excess 210Pb concentrations in bold were used to run CF:CS and CRS models.
				Mixing A			Mixing B			Mixing C
Depth (z)	Cum. Mass (m)	Cum. Mass center	210Pbex (A)	Mixed 210Pbex (A)	210Pbex (C)	Smoothed 210Pbex	Mixed 210Pbex (A)	210Pbex (C)	Smoothed 210Pbex	Mixed Excess 210Pb (A)	210Pbex (C)	Smoothed 210Pbex
cm	g cm-2	g cm-2	Bq m-2	Bq m-2	Bq kg-1	Bq kg-1	Bq m-2	Bq kg-1	Bq kg-1	Bq m-2	Bq kg-1	Bq kg-1
1	0.4	0.2	156.727	146.109	36.5273	35.6516	145.327	36.3317	37.483	156.727	39.1818	38.3864
2	0.8	0.6	150.364	139.104	34.776	35.6933	154.538	38.6344	36.8434	150.364	37.5911	37.6126
3	1.2	1	144.26	143.107	35.7767	36.0269	142.256	35.5641	36.417	144.26	36.065	36.0857
4	1.6	1.4	138.404	150.112	37.528	36.4439	140.21	35.0524	35.223	138.404	34.6009	34.2531
5	2	1.8	132.785	144.108	36.0269	35.1345	140.21	35.0524	33.9845	128.374	32.0934	31.592
6	2.4	2.2	127.394	127.394	31.8486	32.8104	127.394	31.8486	32.4855	112.327	28.0817	29.5861
7	2.8	2.6	122.222	122.222	30.5556	30.5731	122.222	30.5556	30.5731	114.333	28.5832	29.1682
8	3.2	3	117.261	117.261	29.3152	29.3319	117.261	29.3152	29.3319	123.359	30.8397	30.0876
9	3.6	3.4	112.5	112.5	28.1251	28.1412	112.5	28.1251	28.1412	123.359	30.8397	30.4219
10	4	3.8	107.933	107.933	26.9833	26.9987	107.933	26.9833	26.9987	118.344	29.5861	28.7712
11	4.4	4.2	103.551	103.551	25.8878	25.9027	103.551	25.8878	25.9027	103.551	25.8878	26.7703
12	4.8	4.6	99.3475	99.3475	24.8369	24.8511	99.3475	24.8369	24.8511	99.3475	24.8369	24.8511
13	5.2	5	95.3143	95.3143	23.8286	23.8422	95.3143	23.8286	23.8422	95.3143	23.8286	23.8422
14	5.6	5.4	91.4449	91.4449	22.8612	22.8743	91.4449	22.8612	22.8743	91.4449	22.8612	22.8743
15	6	5.8	87.7325	87.7325	21.9331	21.9457	87.7325	21.9331	21.9457	87.7325	21.9331	21.9457
16	6.4	6.2	84.1709	84.1709	21.0427	21.0548	84.1709	21.0427	21.0548	84.1709	21.0427	21.0548
17	6.8	6.6	80.7538	80.7538	20.1885	20.2	80.7538	20.1885	20.2	80.7538	20.1885	20.2
18	7.2	7	77.4755	77.4755	19.3689	19.38	77.4755	19.3689	19.38	77.4755	19.3689	19.38
19	7.6	7.4	74.3302	74.3302	18.5826	18.5932	74.3302	18.5826	18.5932	74.3302	18.5826	18.5932
20	8	7.8	71.3126	71.3126	17.8282	17.8384	71.3126	17.8282	17.8384	71.3126	17.8282	17.8384
21	8.4	8.2	68.4176	68.4176	17.1044	17.4663	68.4176	17.1044	17.4663	68.4176	17.1044	17.4663
22	8.8	8.6	65.6401	65.6401	16.41	16.7572	65.6401	16.41	16.7572	65.6401	16.41	16.7572
23	9.2	9	62.9753	62.9753	15.7438	16.0769	62.9753	15.7438	16.0769	62.9753	15.7438	16.0769
24	9.6	9.4	60.4187	60.4187	15.1047	15.4242	60.4187	15.1047	15.4242	60.4187	15.1047	15.4242
25	10	9.8	57.9659	57.9659	14.4915	14.7981	57.9659	14.4915	14.7981	57.9659	14.4915	14.7981
26	10.4	10.2	55.6127	55.6127	13.9032	14.1973	55.6127	13.9032	14.1973	55.6127	13.9032	14.1973
27	10.8	10.6	53.355	53.355	13.3387	13.621	53.355	13.3387	13.621	53.355	13.3387	13.621
28	11.2	11	51.1889	51.1889	12.7972	13.068	51.1889	12.7972	13.068	51.1889	12.7972	13.068
29	11.6	11.4	49.1108	49.1108	12.2777	12.5375	49.1108	12.2777	12.5375	49.1108	12.2777	12.5375
30	12	11.8	47.1171	47.1171	11.7793	12.0285	47.1171	11.7793	12.0285	47.1171	11.7793	12.0285
31	12.4	12.2	45.2043	45.2043	11.3011	11.5402	45.2043	11.3011	11.5402	45.2043	11.3011	11.5402
32	12.8	12.6	43.3692	43.3692	10.8423	11.0717	43.3692	10.8423	11.0717	43.3692	10.8423	11.0717
33	13.2	13	41.6085	41.6085	10.4021	10.6222	41.6085	10.4021	10.6222	41.6085	10.4021	10.6222
34	13.6	13.4	39.9193	39.9193	9.97983	10.191	39.9193	9.97983	10.191	39.9193	9.97983	10.191
35	14	13.8	38.2987	38.2987	9.57469	9.77726	38.2987	9.57469	9.77726	38.2987	9.57469	9.77726
36	14.4	14.2	36.7439	36.7439	9.18598	9.38034	36.7439	9.18598	9.38034	36.7439	9.18598	9.38034
37	14.8	14.6	35.2523	35.2523	8.81306	8.99952	35.2523	8.81306	8.99952	35.2523	8.81306	8.99952
38	15.2	15	33.8211	33.8211	8.45528	8.63417	33.8211	8.45528	8.63417	33.8211	8.45528	8.63417
39	15.6	15.4	32.4481	32.4481	8.11203	8.28365	32.4481	8.11203	8.28365	32.4481	8.11203	8.28365
40	16	15.8	31.1308	31.1308	7.7827	7.94736	31.1308	7.7827	7.94736	31.1308	7.7827	7.94736
41	16.4	16.2	29.867	29.867	7.46675	7.62473	29.867	7.46675	7.62473	29.867	7.46675	7.62473
42	16.8	16.6	28.6545	28.6545	7.16363	7.31519	28.6545	7.16363	7.31519	28.6545	7.16363	7.31519
43	17.2	17	27.4912	27.4912	6.87281	7.01822	27.4912	6.87281	7.01822	27.4912	6.87281	7.01822
44	17.6	17.4	26.3752	26.3752	6.59379	6.7333	26.3752	6.59379	6.7333	26.3752	6.59379	6.7333
45	18	17.8	25.3044	25.3044	6.32611	6.45995	25.3044	6.32611	6.45995	25.3044	6.32611	6.45995
46	18.4	18.2	24.2771	24.2771	6.06929	6.1977	24.2771	6.06929	6.1977	24.2771	6.06929	6.1977
47	18.8	18.6	23.2916	23.2916	5.82289	5.94609	23.2916	5.82289	5.94609	23.2916	5.82289	5.94609
48	19.2	19	22.346	22.346	5.5865	5.7047	22.346	5.5865	5.7047	22.346	5.5865	5.7047
49	19.6	19.4	21.4388	21.4388	5.35971	5.47311	21.4388	5.35971	5.47311	21.4388	5.35971	5.47311
50	20	19.8	20.5685	20.5685	5.14212	5.25092	20.5685	5.14212	5.25092	20.5685	5.14212	5.25092
51	20.4	20.2	19.7335	19.7335	4.93337	5.03775	19.7335	4.93337	5.03775	19.7335	4.93337	5.03775
52	20.8	20.6	18.9324	18.9324	4.73309	4.83323	18.9324	4.73309	4.83323	18.9324	4.73309	4.83323
53	21.2	21	18.1638	18.1638	4.54094	4.63702	18.1638	4.54094	4.63702	18.1638	4.54094	4.63702
54	21.6	21.4	17.4264	17.4264	4.3566	4.44877	17.4264	4.3566	4.44877	17.4264	4.3566	4.44877
55	22	21.8	16.7189	16.7189	4.17973	4.26816	16.7189	4.17973	4.26816	16.7189	4.17973	4.26816
56	22.4	22.2	16.0402	16.0402	4.01005	4.09489	16.0402	4.01005	4.09489	16.0402	4.01005	4.09489
57	22.8	22.6	15.389	15.389	3.84725	3.92865	15.389	3.84725	3.92865	15.389	3.84725	3.92865
58	23.2	23	14.7643	14.7643	3.69107	3.76916	14.7643	3.69107	3.76916	14.7643	3.69107	3.76916
59	23.6	23.4	14.1649	14.1649	3.54122	3.61615	14.1649	3.54122	3.61615	14.1649	3.54122	3.61615
60	24	23.8	13.5898	13.5898	3.39746	3.46934	13.5898	3.39746	3.46934	13.5898	3.39746	3.46934
61	24.4	24.2	13.0381	13.0381	3.25953	3.3285	13.0381	3.25953	3.3285	13.0381	3.25953	3.3285
62	24.8	24.6	12.5088	12.5088	3.12721	3.19337	12.5088	3.12721	3.19337	12.5088	3.12721	3.19337
63	25.2	25	12.001	12.001	3.00025	3.06373	12.001	3.00025	3.06373	12.001	3.00025	3.06373
64	25.6	25.4	11.5138	11.5138	2.87845	2.93935	11.5138	2.87845	2.93935	11.5138	2.87845	2.93935
65	26	25.8	11.0464	11.0464	2.7616	2.82003	11.0464	2.7616	2.82003	11.0464	2.7616	2.82003
66	26.4	26.2	10.5979	10.5979	2.64949	2.70554	10.5979	2.64949	2.70554	10.5979	2.64949	2.70554
67	26.8	26.6	10.1677	10.1677	2.54193	2.59571	10.1677	2.54193	2.59571	10.1677	2.54193	2.59571
68	27.2	27	9.75493	9.75493	2.43873	2.49033	9.75493	2.43873	2.49033	9.75493	2.43873	2.49033
69	27.6	27.4	9.35891	9.35891	2.33973	2.38923	9.35891	2.33973	2.38923	9.35891	2.33973	2.38923
70	28	27.8	8.97897	8.97897	2.24474	2.29223	8.97897	2.24474	2.29223	8.97897	2.24474	2.29223
71	28.4	28.2	8.61445	8.61445	2.15361	2.19918	8.61445	2.15361	2.19918	8.61445	2.15361	2.19918
72	28.8	28.6	8.26473	8.26473	2.06618	2.1099	8.26473	2.06618	2.1099	8.26473	2.06618	2.1099
73	29.2	29	7.92921	7.92921	1.9823	2.02424	7.92921	1.9823	2.02424	7.92921	1.9823	2.02424
74	29.6	29.4	7.60731	7.60731	1.90183	1.94207	7.60731	1.90183	1.94207	7.60731	1.90183	1.94207
75	30	29.8	7.29848	7.29848	1.82462	1.86322	7.29848	1.82462	1.86322	7.29848	1.82462	1.86322
76	30.4	30.2	7.00218	7.00218	1.75055	1.78758	7.00218	1.75055	1.78758	7.00218	1.75055	1.78758
77	30.8	30.6	6.71792	6.71792	1.67948	1.71501	6.71792	1.67948	1.71501	6.71792	1.67948	1.71501
78	31.2	31	6.44519	6.44519	1.6113	1.64539	6.44519	1.6113	1.64539	6.44519	1.6113	1.64539
79	31.6	31.4	6.18354	6.18354	1.54588	1.57859	6.18354	1.54588	1.57859	6.18354	1.54588	1.57859
80	32	31.8	5.93251	5.93251	1.48313	1.51451	5.93251	1.48313	1.51451	5.93251	1.48313	1.51451
81	32.4	32.2	5.69167	5.69167	1.42292	1.45302	5.69167	1.42292	1.45302	5.69167	1.42292	1.45302
82	32.8	32.6	5.4606	5.4606	1.36515	1.39403	5.4606	1.36515	1.39403	5.4606	1.36515	1.39403
83	33.2	33	5.23892	5.23892	1.30973	1.33744	5.23892	1.30973	1.33744	5.23892	1.30973	1.33744
84	33.6	33.4	5.02624	5.02624	1.25656	1.28315	5.02624	1.25656	1.28315	5.02624	1.25656	1.28315
85	34	33.8	4.82219	4.82219	1.20555	1.23105	4.82219	1.20555	1.23105	4.82219	1.20555	1.23105
86	34.4	34.2	4.62642	4.62642	1.15661	1.18108	4.62642	1.15661	1.18108	4.62642	1.15661	1.18108
87	34.8	34.6	4.43861	4.43861	1.10965	1.13313	4.43861	1.10965	1.13313	4.43861	1.10965	1.13313
88	35.2	35	4.25841	4.25841	1.0646	1.08713	4.25841	1.0646	1.08713	4.25841	1.0646	1.08713
89	35.6	35.4	4.08554	4.08554	1.02138	1.04299	4.08554	1.02138	1.04299	4.08554	1.02138	1.04299
90	36	35.8	3.91968	3.91968	0.979919	1.00065	3.91968	0.979919	1.00065	3.91968	0.979919	1.00065
91	36.4	36.2	3.76055	3.76055	0.940138	0.960029	3.76055	0.940138	0.960029	3.76055	0.940138	0.960029
92	36.8	36.6	3.60789	3.60789	0.901971	0.921055	3.60789	0.901971	0.921055	3.60789	0.901971	0.921055
93	37.2	37	3.46142	3.46142	0.865354	0.883663	3.46142	0.865354	0.883663	3.46142	0.865354	0.883663
94	37.6	37.4	3.32089	3.32089	0.830224	0.847789	3.32089	0.830224	0.847789	3.32089	0.830224	0.847789
95	38	37.8	3.18608	3.18608	0.796519	0.813371	3.18608	0.796519	0.813371	3.18608	0.796519	0.813371
96	38.4	38.2	3.05673	3.05673	0.764183	0.780351	3.05673	0.764183	0.780351	3.05673	0.764183	0.780351
97	38.8	38.6	2.93264	2.93264	0.73316	0.748672	2.93264	0.73316	0.748672	2.93264	0.73316	0.748672
98	39.2	39	2.81358	2.81358	0.703396	0.718278	2.81358	0.703396	0.718278	2.81358	0.703396	0.718278
99	39.6	39.4	2.69936	2.69936	0.67484	0.689118	2.69936	0.67484	0.689118	2.69936	0.67484	0.689118
100	40	39.8	2.58978	2.58978	0.647444	0.661142	2.58978	0.647444	0.661142	2.58978	0.647444	0.661142
101	40.4	40.2	2.48464	2.48464	0.62116	0.634302	2.48464	0.62116	0.634302	2.48464	0.62116	0.634302
102	40.8	40.6	2.38377	2.38377	0.595943	0.608551	2.38377	0.595943	0.608551	2.38377	0.595943	0.608551
103	41.2	41	2.287	2.287	0.57175	0.583846	2.287	0.57175	0.583846	2.287	0.57175	0.583846
104	41.6	41.4	2.19415	2.19415	0.548538	0.560144	2.19415	0.548538	0.560144	2.19415	0.548538	0.560144
105	42	41.8	2.10508	2.10508	0.52627	0.537404	2.10508	0.52627	0.537404	2.10508	0.52627	0.537404
106	42.4	42.2	2.01962	2.01962	0.504905	0.515587	2.01962	0.504905	0.515587	2.01962	0.504905	0.515587
107	42.8	42.6	1.93763	1.93763	0.484407	0.494656	1.93763	0.484407	0.494656	1.93763	0.484407	0.494656
108	43.2	43	1.85897	1.85897	0.464742	0.474575	1.85897	0.464742	0.474575	1.85897	0.464742	0.474575
109	43.6	43.4	1.7835	1.7835	0.445875	0.455308	1.7835	0.445875	0.455308	1.7835	0.445875	0.455308
110	44	43.8	1.7111	1.7111	0.427774	0.436824	1.7111	0.427774	0.436824	1.7111	0.427774	0.436824
111	44.4	44.2	1.64163	1.64163	0.410408	0.419091	1.64163	0.410408	0.419091	1.64163	0.410408	0.419091
112	44.8	44.6	1.57499	1.57499	0.393746	0.402077	1.57499	0.393746	0.402077	1.57499	0.393746	0.402077
113	45.2	45	1.51105	1.51105	0.377762	0.385754	1.51105	0.377762	0.385754	1.51105	0.377762	0.385754

## Sheet: Table 3a
Table 3a. Simulation outputs for increasing sedimentation (scenarios D, E, F and G) in seagrass sediments. Considering a constant flux of excess 210Pb of Φ = 120 Bq m-2 yr-1, DBD: 1.03 g cm-3 and increasing mass accumulation rates (MAR) (20%, 50%, 200% ad 300%).
Ideal Profile					20% Increase in MAR			50% Increase in MAR			200% Increase in MAR			300% Increase in MAR
Depth (z)	Cum. Mass (m)	210Pbex (A)	210Pbex (I)	Age	Increasing MAR	Cum. Mass (m)	210Pbex (C)	Increasing MAR	Cum. Mass (m)	210Pbex (C)	Increasing MAR	Cum. Mass (m)	210Pbex (C)	Increasing MAR	Cum. Mass (m)	210Pbex (C)
cm	g cm-2	Bq m-2	Bq m-2	yr	g cm-2 yr-1	g cm-2	Bq kg-1	g cm-2 yr-1	g cm-2	Bq kg-1	g cm-2 yr-1	g cm-2	Bq kg-1	g cm-2 yr-1	g cm-2	Bq kg-1
1	1.236	571.034	3828.69	5.15	0.24	1.236	49.742	0.3	1.545	39.7035	0.4	2.06	29.7777	0.6	3.09	19.8518
2	2.43767	486.566	3257.66	10.3	0.233333	2.43767	43.5497	0.283333	3.00417	35.7691	0.366667	3.94833	27.6397	0.533333	5.83667	19.0023
3	3.605	414.593	2771.09	15.45	0.226667	3.605	38.1524	0.266667	4.3775	32.3282	0.333333	5.665	25.8626	0.466667	8.24	18.4733
4	4.738	353.265	2356.5	20.6	0.22	4.738	33.4458	0.25	5.665	29.3243	0.3	7.21	24.4369	0.4	10.3	18.3277
5	5.83667	301.01	2003.23	25.75	0.213333	5.83667	29.3394	0.233333	6.86667	26.7088	0.266667	8.58333	23.3702	0.333333	12.0167	18.6962
6	6.901	256.484	1702.22	30.9	0.206667	6.901	25.7547	0.216667	7.9825	24.4413	0.233333	9.785	22.6955	0.266667	13.39	19.8586
7	7.931	218.545	1445.74	36.05	0.2	7.931	22.6236	0.2	9.0125	22.4885	0.2	10.815	22.4885	0.2	14.42	22.4885
8	8.961	186.217	1227.19	41.2	0.2	8.961	19.2241	0.2	10.0425	19.089	0.2	11.845	19.089	0.2	15.45	19.089
9	9.991	158.672	1040.98	46.35	0.2	9.991	16.3275	0.2	11.0725	16.1924	0.2	12.875	16.1924	0.2	16.48	16.1924
10	11.021	135.201	882.306	51.5	0.2	11.021	13.8593	0.2	12.1025	13.7243	0.2	13.905	13.7243	0.2	17.51	13.7243
11	12.051	115.202	747.105	56.65	0.2	12.051	11.7563	0.2	13.1325	11.6212	0.2	14.935	11.6212	0.2	18.54	11.6212
12	13.081	98.1608	631.904	61.8	0.2	13.081	9.96434	0.2	14.1625	9.82926	0.2	15.965	9.82926	0.2	19.57	9.82926
13	14.111	83.6407	533.743	66.95	0.2	14.111	8.43745	0.2	15.1925	8.30237	0.2	16.995	8.30237	0.2	20.6	8.30237
14	15.141	71.2685	450.102	72.1	0.2	15.141	7.13642	0.2	16.2225	7.00134	0.2	18.025	7.00134	0.2	21.63	7.00134
15	16.171	60.7263	378.834	77.25	0.2	16.171	6.02783	0.2	17.2525	5.89276	0.2	19.055	5.89276	0.2	22.66	5.89276
16	17.201	51.7436	318.107	82.4	0.2	17.201	5.08324	0.2	18.2825	4.94816	0.2	20.085	4.94816	0.2	23.69	4.94816
17	18.231	44.0896	266.364	87.55	0.2	18.231	4.27837	0.2	19.3125	4.14329	0.2	21.115	4.14329	0.2	24.72	4.14329
18	19.261	37.5678	222.274	92.7	0.2	19.261	3.59255	0.2	20.3425	3.45747	0.2	22.145	3.45747	0.2	25.75	3.45747
19	20.291	32.0107	184.706	97.85	0.2	20.291	3.00818	0.2	21.3725	2.87311	0.2	23.175	2.87311	0.2	26.78	2.87311
20	21.321	27.2756	152.696	103	0.2	21.321	2.51026	0.2	22.4025	2.37518	0.2	24.205	2.37518	0.2	27.81	2.37518
21	22.351	23.241	125.42	108.15	0.2	22.351	2.08598	0.2	23.4325	1.95091	0.2	25.235	1.95091	0.2	28.84	1.95091
22	23.381	19.8032	102.179	113.3	0.2	23.381	1.72447	0.2	24.4625	1.58939	0.2	26.265	1.58939	0.2	29.87	1.58939
23	24.411	16.8738	82.3759	118.45	0.2	24.411	1.41643	0.2	25.4925	1.28136	0.2	27.295	1.28136	0.2	30.9	1.28136
24	25.441	14.3778	65.502	123.6	0.2	25.441	1.15396	0.2	26.5225	1.01888	0.2	28.325	1.01888	0.2	31.93	1.01888
25	26.471	12.251	51.1242	128.75	0.2	26.471	0.930313	0.2	27.5525	0.795237	0.2	29.355	0.795237	0.2	32.96	0.795237
26	27.501	10.4389	38.8731	133.9	0.2	27.501	0.739748	0.2	28.5825	0.604671	0.2	30.385	0.604671	0.2	33.99	0.604671
27	28.531	8.89472	28.4343	139.05	0.2	28.531	0.577372	0.2	29.6125	0.442295	0.2	31.415	0.442295	0.2	35.02	0.442295
28	29.561	7.579	19.5395	144.2	0.2	29.561	0.439014	0.2	30.6425	0.303938	0.2	32.445	0.303938	0.2	36.05	0.303938
29	30.591	6.45791	11.9605	149.35	0.2	30.591	0.321123	0.2	31.6725	0.186046	0.2	33.475	0.186046	0.2	37.08	0.186046
				Real centennial MAR	0.201965			0.204912			0.209825			0.219649

## Sheet: Table 3b
Table 3b. Simulation outputs for increasing sedimentation (scenarios D, E, F and G) in mangrove/tidal marsh sediments. Considering a constant flux of excess 210Pb of Φ = 120 Bq m-2 yr-1, DBD: 0.4 g cm-3 and increasing mass accumulation rates (MAR) (20%, 50%, 200% ad 300%).
Ideal Profile					20% Increase in MAR			50% Increase in MAR			200% Increase in MAR			300% Increase in MAR
Depth (z)	Cum. Mass (m)	210Pbex (A)	210Pbex (I)	Age	Increasing MAR	Cum. Mass (m)	210Pbex (C)	Increasing MAR	Cum. Mass (m)	210Pbex (C)	Increasing MAR	Cum. Mass (m)	210Pbex (C)	Increasing MAR	Cum. Mass (m)	210Pbex (C)
cm	g cm-2	Bq m-2	Bq m-2	yr	g cm-2 yr-1	g cm-2	Bq kg-1	g cm-2 yr-1	g cm-2	Bq kg-1	g cm-2 yr-1	g cm-2	Bq kg-1	g cm-2 yr-1	g cm-2	Bq kg-1
1	0.2	156.727	3824.87	1.33333	0.36	0.48	33.0533	0.45	0.6	26.4426	0.6	0.8	19.832	0.9	1.2	13.2213
2	0.6	150.364	3668.15	2.66667	0.357391	0.956522	31.9303	0.443478	1.1913	25.732	0.586957	1.58261	19.442	0.873913	2.36522	13.0581
3	1	144.26	3517.78	4	0.354783	1.42957	30.8465	0.436957	1.77391	25.0456	0.573913	2.34783	19.0688	0.847826	3.49565	12.9081
4	1.4	138.404	3373.52	5.33333	0.352174	1.89913	29.8007	0.430435	2.34783	24.3824	0.56087	3.09565	18.7121	0.821739	4.5913	12.7717
5	1.8	132.785	3235.12	6.66667	0.349565	2.36522	28.7913	0.423913	2.91304	23.7418	0.547826	3.82609	18.3716	0.795652	5.65217	12.6493
6	2.2	127.394	3102.33	8	0.346957	2.82783	27.8172	0.417391	3.46957	23.123	0.534783	4.53913	18.0473	0.769565	6.67826	12.5413
7	2.6	122.222	2974.94	9.33333	0.344348	3.28696	26.877	0.41087	4.01739	22.5255	0.521739	5.23478	17.7388	0.743478	7.66957	12.4483
8	3	117.261	2852.72	10.6667	0.341739	3.74261	25.9695	0.404348	4.55652	21.9484	0.508696	5.91304	17.4462	0.717391	8.62609	12.3709
9	3.4	112.5	2735.46	12	0.33913	4.19478	25.0936	0.397826	5.08696	21.3913	0.495652	6.57391	17.1693	0.691304	9.54783	12.3101
10	3.8	107.933	2622.96	13.3333	0.336522	4.64348	24.2481	0.391304	5.6087	20.8534	0.482609	7.21739	16.9081	0.665217	10.4348	12.2667
11	4.2	103.551	2515.02	14.6667	0.333913	5.0887	23.4319	0.384783	6.12174	20.3342	0.469565	7.84348	16.6627	0.63913	11.287	12.242
12	4.6	99.3475	2411.47	16	0.331304	5.53043	22.6441	0.378261	6.62609	19.8331	0.456522	8.45217	16.4331	0.613043	12.1043	12.2374
13	5	95.3143	2312.12	17.3333	0.328696	5.9687	21.8835	0.371739	7.12174	19.3496	0.443478	9.04348	16.2195	0.586957	12.887	12.2548
14	5.4	91.4449	2216.81	18.6667	0.326087	6.40348	21.1492	0.365217	7.6087	18.8833	0.430435	9.61739	16.0222	0.56087	13.6348	12.2961
15	5.8	87.7325	2125.36	20	0.323478	6.83478	20.4403	0.358696	8.08696	18.4335	0.417391	10.1739	15.8413	0.534783	14.3478	12.3639
16	6.2	84.1709	2037.63	21.3333	0.32087	7.26261	19.7559	0.352174	8.55652	17.9998	0.404348	10.713	15.6773	0.508696	15.0261	12.4614
17	6.6	80.7538	1953.46	22.6667	0.318261	7.68696	19.0951	0.345652	9.01739	17.5819	0.391304	11.2348	15.5307	0.482609	15.6696	12.5924
18	7	77.4755	1872.71	24	0.315652	8.10783	18.457	0.33913	9.46957	17.1792	0.378261	11.7391	15.402	0.456522	16.2783	12.7617
19	7.4	74.3302	1795.23	25.3333	0.313043	8.52522	17.8409	0.332609	9.91304	16.7914	0.365217	12.2261	15.2922	0.430435	16.8522	12.9752
20	7.8	71.3126	1720.9	26.6667	0.310435	8.93913	17.2459	0.326087	10.3478	16.4181	0.352174	12.6957	15.2019	0.404348	17.3913	13.2404
21	8.2	68.4176	1649.59	28	0.307826	9.34957	16.6713	0.319565	10.7739	16.0589	0.33913	13.1478	15.1324	0.378261	17.8957	13.567
22	8.6	65.6401	1581.17	29.3333	0.305217	9.75652	16.1165	0.313043	11.1913	15.7135	0.326087	13.5826	15.085	0.352174	18.3652	13.9676
23	9	62.9753	1515.53	30.6667	0.302609	10.16	15.5806	0.306522	11.6	15.3817	0.313043	14	15.0612	0.326087	18.8	14.4588
24	9.4	60.4187	1452.56	32	0.3	10.56	15.063	0.3	12	15.063	0.3	14.4	15.063	0.3	19.2	15.063
25	9.8	57.9659	1392.14	33.3333	0.3	10.96	14.4365	0.3	12.4	14.4365	0.3	14.8	14.4365	0.3	19.6	14.4365
26	10.2	55.6127	1334.17	34.6667	0.3	11.36	13.8354	0.3	12.8	13.8354	0.3	15.2	13.8354	0.3	20	13.8354
27	10.6	53.355	1278.56	36	0.3	11.76	13.2586	0.3	13.2	13.2586	0.3	15.6	13.2586	0.3	20.4	13.2586
28	11	51.1889	1225.2	37.3333	0.3	12.16	12.7054	0.3	13.6	12.7054	0.3	16	12.7054	0.3	20.8	12.7054
29	11.4	49.1108	1174.01	38.6667	0.3	12.56	12.1745	0.3	14	12.1745	0.3	16.4	12.1745	0.3	21.2	12.1745
30	11.8	47.1171	1124.9	40	0.3	12.96	11.6652	0.3	14.4	11.6652	0.3	16.8	11.6652	0.3	21.6	11.6652
31	12.2	45.2043	1077.79	41.3333	0.3	13.36	11.1766	0.3	14.8	11.1766	0.3	17.2	11.1766	0.3	22	11.1766
32	12.6	43.3692	1032.58	42.6667	0.3	13.76	10.7079	0.3	15.2	10.7079	0.3	17.6	10.7079	0.3	22.4	10.7079
33	13	41.6085	989.213	44	0.3	14.16	10.2581	0.3	15.6	10.2581	0.3	18	10.2581	0.3	22.8	10.2581
34	13.4	39.9193	947.604	45.3333	0.3	14.56	9.82666	0.3	16	9.82666	0.3	18.4	9.82666	0.3	23.2	9.82666
35	13.8	38.2987	907.685	46.6667	0.3	14.96	9.41269	0.3	16.4	9.41269	0.3	18.8	9.41269	0.3	23.6	9.41269
36	14.2	36.7439	869.386	48	0.3	15.36	9.01554	0.3	16.8	9.01554	0.3	19.2	9.01554	0.3	24	9.01554
37	14.6	35.2523	832.642	49.3333	0.3	15.76	8.6345	0.3	17.2	8.6345	0.3	19.6	8.6345	0.3	24.4	8.6345
38	15	33.8211	797.39	50.6667	0.3	16.16	8.26894	0.3	17.6	8.26894	0.3	20	8.26894	0.3	24.8	8.26894
39	15.4	32.4481	763.569	52	0.3	16.56	7.91821	0.3	18	7.91821	0.3	20.4	7.91821	0.3	25.2	7.91821
40	15.8	31.1308	731.121	53.3333	0.3	16.96	7.58172	0.3	18.4	7.58172	0.3	20.8	7.58172	0.3	25.6	7.58172
41	16.2	29.867	699.99	54.6667	0.3	17.36	7.2589	0.3	18.8	7.2589	0.3	21.2	7.2589	0.3	26	7.2589
42	16.6	28.6545	670.123	56	0.3	17.76	6.94918	0.3	19.2	6.94918	0.3	21.6	6.94918	0.3	26.4	6.94918
43	17	27.4912	641.469	57.3333	0.3	18.16	6.65203	0.3	19.6	6.65203	0.3	22	6.65203	0.3	26.8	6.65203
44	17.4	26.3752	613.977	58.6667	0.3	18.56	6.36694	0.3	20	6.36694	0.3	22.4	6.36694	0.3	27.2	6.36694
45	17.8	25.3044	587.602	60	0.3	18.96	6.09343	0.3	20.4	6.09343	0.3	22.8	6.09343	0.3	27.6	6.09343
46	18.2	24.2771	562.298	61.3333	0.3	19.36	5.83103	0.3	20.8	5.83103	0.3	23.2	5.83103	0.3	28	5.83103
47	18.6	23.2916	538.021	62.6667	0.3	19.76	5.57927	0.3	21.2	5.57927	0.3	23.6	5.57927	0.3	28.4	5.57927
48	19	22.346	514.729	64	0.3	20.16	5.33774	0.3	21.6	5.33774	0.3	24	5.33774	0.3	28.8	5.33774
49	19.4	21.4388	492.383	65.3333	0.3	20.56	5.10601	0.3	22	5.10601	0.3	24.4	5.10601	0.3	29.2	5.10601
50	19.8	20.5685	470.944	66.6667	0.3	20.96	4.88369	0.3	22.4	4.88369	0.3	24.8	4.88369	0.3	29.6	4.88369
51	20.2	19.7335	450.376	68	0.3	21.36	4.6704	0.3	22.8	4.6704	0.3	25.2	4.6704	0.3	30	4.6704
52	20.6	18.9324	430.642	69.3333	0.3	21.76	4.46576	0.3	23.2	4.46576	0.3	25.6	4.46576	0.3	30.4	4.46576
53	21	18.1638	411.71	70.6667	0.3	22.16	4.26943	0.3	23.6	4.26943	0.3	26	4.26943	0.3	30.8	4.26943
54	21.4	17.4264	393.546	72	0.3	22.56	4.08107	0.3	24	4.08107	0.3	26.4	4.08107	0.3	31.2	4.08107
55	21.8	16.7189	376.12	73.3333	0.3	22.96	3.90036	0.3	24.4	3.90036	0.3	26.8	3.90036	0.3	31.6	3.90036
56	22.2	16.0402	359.401	74.6667	0.3	23.36	3.72699	0.3	24.8	3.72699	0.3	27.2	3.72699	0.3	32	3.72699
57	22.6	15.389	343.361	76	0.3	23.76	3.56065	0.3	25.2	3.56065	0.3	27.6	3.56065	0.3	32.4	3.56065
58	23	14.7643	327.971	77.3333	0.3	24.16	3.40106	0.3	25.6	3.40106	0.3	28	3.40106	0.3	32.8	3.40106
59	23.4	14.1649	313.207	78.6667	0.3	24.56	3.24796	0.3	26	3.24796	0.3	28.4	3.24796	0.3	33.2	3.24796
60	23.8	13.5898	299.042	80	0.3	24.96	3.10107	0.3	26.4	3.10107	0.3	28.8	3.10107	0.3	33.6	3.10107
61	24.2	13.0381	285.452	81.3333	0.3	25.36	2.96014	0.3	26.8	2.96014	0.3	29.2	2.96014	0.3	34	2.96014
62	24.6	12.5088	272.414	82.6667	0.3	25.76	2.82494	0.3	27.2	2.82494	0.3	29.6	2.82494	0.3	34.4	2.82494
63	25	12.001	259.906	84	0.3	26.16	2.69522	0.3	27.6	2.69522	0.3	30	2.69522	0.3	34.8	2.69522
64	25.4	11.5138	247.904	85.3333	0.3	26.56	2.57077	0.3	28	2.57077	0.3	30.4	2.57077	0.3	35.2	2.57077
65	25.8	11.0464	236.391	86.6667	0.3	26.96	2.45137	0.3	28.4	2.45137	0.3	30.8	2.45137	0.3	35.6	2.45137
66	26.2	10.5979	225.344	88	0.3	27.36	2.33682	0.3	28.8	2.33682	0.3	31.2	2.33682	0.3	36	2.33682
67	26.6	10.1677	214.746	89.3333	0.3	27.76	2.22692	0.3	29.2	2.22692	0.3	31.6	2.22692	0.3	36.4	2.22692
68	27	9.75493	204.579	90.6667	0.3	28.16	2.12148	0.3	29.6	2.12148	0.3	32	2.12148	0.3	36.8	2.12148
69	27.4	9.35891	194.824	92	0.3	28.56	2.02032	0.3	30	2.02032	0.3	32.4	2.02032	0.3	37.2	2.02032
70	27.8	8.97897	185.465	93.3333	0.3	28.96	1.92327	0.3	30.4	1.92327	0.3	32.8	1.92327	0.3	37.6	1.92327
71	28.2	8.61445	176.486	94.6667	0.3	29.36	1.83016	0.3	30.8	1.83016	0.3	33.2	1.83016	0.3	38	1.83016
72	28.6	8.26473	167.871	96	0.3	29.76	1.74083	0.3	31.2	1.74083	0.3	33.6	1.74083	0.3	38.4	1.74083
73	29	7.92921	159.607	97.3333	0.3	30.16	1.65512	0.3	31.6	1.65512	0.3	34	1.65512	0.3	38.8	1.65512
74	29.4	7.60731	151.677	98.6667	0.3	30.56	1.5729	0.3	32	1.5729	0.3	34.4	1.5729	0.3	39.2	1.5729
75	29.8	7.29848	144.07	100	0.3	30.96	1.49401	0.3	32.4	1.49401	0.3	34.8	1.49401	0.3	39.6	1.49401
76	30.2	7.00218	136.772	101.333	0.3	31.36	1.41832	0.3	32.8	1.41832	0.3	35.2	1.41832	0.3	40	1.41832
77	30.6	6.71792	129.769	102.667	0.3	31.76	1.34571	0.3	33.2	1.34571	0.3	35.6	1.34571	0.3	40.4	1.34571
78	31	6.44519	123.052	104	0.3	32.16	1.27604	0.3	33.6	1.27604	0.3	36	1.27604	0.3	40.8	1.27604
79	31.4	6.18354	116.606	105.333	0.3	32.56	1.20921	0.3	34	1.20921	0.3	36.4	1.20921	0.3	41.2	1.20921
80	31.8	5.93251	110.423	106.667	0.3	32.96	1.14508	0.3	34.4	1.14508	0.3	36.8	1.14508	0.3	41.6	1.14508
81	32.2	5.69167	104.49	108	0.3	33.36	1.08356	0.3	34.8	1.08356	0.3	37.2	1.08356	0.3	42	1.08356
82	32.6	5.4606	98.7986	109.333	0.3	33.76	1.02454	0.3	35.2	1.02454	0.3	37.6	1.02454	0.3	42.4	1.02454
83	33	5.23892	93.338	110.667	0.3	34.16	0.967916	0.3	35.6	0.967916	0.3	38	0.967916	0.3	42.8	0.967916
84	33.4	5.02624	88.0991	112	0.3	34.56	0.913588	0.3	36	0.913588	0.3	38.4	0.913588	0.3	43.2	0.913588
85	33.8	4.82219	83.0729	113.333	0.3	34.96	0.861466	0.3	36.4	0.861466	0.3	38.8	0.861466	0.3	43.6	0.861466
86	34.2	4.62642	78.2507	114.667	0.3	35.36	0.81146	0.3	36.8	0.81146	0.3	39.2	0.81146	0.3	44	0.81146
87	34.6	4.43861	73.6243	116	0.3	35.76	0.763484	0.3	37.2	0.763484	0.3	39.6	0.763484	0.3	44.4	0.763484
88	35	4.25841	69.1857	117.333	0.3	36.16	0.717455	0.3	37.6	0.717455	0.3	40	0.717455	0.3	44.8	0.717455
89	35.4	4.08554	64.9272	118.667	0.3	36.56	0.673296	0.3	38	0.673296	0.3	40.4	0.673296	0.3	45.2	0.673296
90	35.8	3.91968	60.8417	120	0.3	36.96	0.630929	0.3	38.4	0.630929	0.3	40.8	0.630929	0.3	45.6	0.630929
91	36.2	3.76055	56.922	121.333	0.3	37.36	0.590281	0.3	38.8	0.590281	0.3	41.2	0.590281	0.3	46	0.590281
92	36.6	3.60789	53.1615	122.667	0.3	37.76	0.551285	0.3	39.2	0.551285	0.3	41.6	0.551285	0.3	46.4	0.551285
93	37	3.46142	49.5536	124	0.3	38.16	0.513871	0.3	39.6	0.513871	0.3	42	0.513871	0.3	46.8	0.513871
94	37.4	3.32089	46.0922	125.333	0.3	38.56	0.477976	0.3	40	0.477976	0.3	42.4	0.477976	0.3	47.2	0.477976
95	37.8	3.18608	42.7713	126.667	0.3	38.96	0.443538	0.3	40.4	0.443538	0.3	42.8	0.443538	0.3	47.6	0.443538
96	38.2	3.05673	39.5852	128	0.3	39.36	0.410499	0.3	40.8	0.410499	0.3	43.2	0.410499	0.3	48	0.410499
97	38.6	2.93264	36.5285	129.333	0.3	39.76	0.3788	0.3	41.2	0.3788	0.3	43.6	0.3788	0.3	48.4	0.3788
98	39	2.81358	33.5958	130.667	0.3	40.16	0.348389	0.3	41.6	0.348389	0.3	44	0.348389	0.3	48.8	0.348389
99	39.4	2.69936	30.7823	132	0.3	40.56	0.319212	0.3	42	0.319212	0.3	44.4	0.319212	0.3	49.2	0.319212
100	39.8	2.58978	28.0829	133.333	0.3	40.96	0.29122	0.3	42.4	0.29122	0.3	44.8	0.29122	0.3	49.6	0.29122
101	40.2	2.48464	25.4931	134.667	0.3	41.36	0.264364	0.3	42.8	0.264364	0.3	45.2	0.264364	0.3	50	0.264364
102	40.6	2.38377	23.0085	136	0.3	41.76	0.238598	0.3	43.2	0.238598	0.3	45.6	0.238598	0.3	50.4	0.238598
103	41	2.287	20.6247	137.333	0.3	42.16	0.213878	0.3	43.6	0.213878	0.3	46	0.213878	0.3	50.8	0.213878
104	41.4	2.19415	18.3377	138.667	0.3	42.56	0.190162	0.3	44	0.190162	0.3	46.4	0.190162	0.3	51.2	0.190162
105	41.8	2.10508	16.1436	140	0.3	42.96	0.167409	0.3	44.4	0.167409	0.3	46.8	0.167409	0.3	51.6	0.167409
106	42.2	2.01962	14.0385	141.333	0.3	43.36	0.145579	0.3	44.8	0.145579	0.3	47.2	0.145579	0.3	52	0.145579
107	42.6	1.93763	12.0189	142.667	0.3	43.76	0.124636	0.3	45.2	0.124636	0.3	47.6	0.124636	0.3	52.4	0.124636
108	43	1.85897	10.0812	144	0.3	44.16	0.104542	0.3	45.6	0.104542	0.3	48	0.104542	0.3	52.8	0.104542
109	43.4	1.7835	8.22226	145.333	0.3	44.56	0.0852648	0.3	46	0.0852648	0.3	48.4	0.0852648	0.3	53.2	0.0852648
110	43.8	1.7111	6.43876	146.667	0.3	44.96	0.0667699	0.3	46.4	0.0667699	0.3	48.8	0.0667699	0.3	53.6	0.0667699
111	44.2	1.64163	4.72766	148	0.3	45.36	0.0490259	0.3	46.8	0.0490259	0.3	49.2	0.0490259	0.3	54	0.0490259
112	44.6	1.57499	3.08603	149.333	0.3	45.76	0.0320022	0.3	47.2	0.0320022	0.3	49.6	0.0320022	0.3	54.4	0.0320022
113	45	1.51105	1.51105	150.667	0.3	46.16	0.0156696	0.3	47.6	0.0156696	0.3	50	0.0156696	0.3	54.8	0.0156696
				Real centennial MAR	0.302051			0.305126			0.310253			0.320506

## Sheet: Table 4a
Table 4a. Simulation outputs of erosion scenarios (H, J and K) in seagrass sediments. Considering a constant flux of excess 210Pb of Φ = 120 Bq m-2 yr-1 and DBD: 1.03 g cm-3. Excess 210Pb concentrations in bold were used to run CF:CS and CRS models.
				Recent Erosion (H)			Past Erosion (I)				Past Erosion (J)
Depth (z)	Cum. Mass (m)	210Pbex (A)	210Pbex	Corrected cum. Mass (m)	210Pbex (A)	210Pbex (C)	Corrected cum. Mass (m)	210Pbex (A)	210Pbex (C)	Smoothed 210Pbex (C)	Corrected cum. Mass (m)	210Pbex (A)	210Pbex (C)	Smoothed 210Pbex (C)
cm	g cm-2	Bq m-2	Bq kg-1	g cm-2	Bq m-2	Bq kg-1	g cm-2	Bq m-2	Bq kg-1	Bq kg-1	g cm-2	Bq m-2	Bq kg-1	Bq kg-1
1	1.03	571.034	55.4402				1.03	571.034	55.4402	51.3398	1.03	571.034	55.4402	51.3398
2	2.06	486.566	47.2394				2.06	486.566	47.2394	43.7456	2.06	486.566	47.2394	43.7456
3	3.09	414.593	40.2517				3.09	414.593	40.2517	37.2747	3.09	414.593	40.2517	37.2747
4	4.12	353.265	34.2976				4.12	353.265	34.2976	28.578	4.12	353.265	34.2976	31.7609
5	5.15	301.01	29.2243								5.15	301.01	29.2243	27.0628
6	6.18	256.484	24.9014								6.18	256.484	24.9014	23.0596
7	7.21	218.545	21.2179	1.03	218.545	21.2179					7.21	218.545	21.2179	19.6486
8	8.24	186.217	18.0793	2.06	186.217	18.0793					8.24	186.217	18.0793	16.7422
9	9.27	158.672	15.405	3.09	158.672	15.405					9.27	158.672	15.405	12.836
10	10.3	135.201	13.1263	4.12	135.201	13.1263
11	11.33	115.202	11.1846	5.15	115.202	11.1846	5.15	115.202	11.1846	18.3375
12	12.36	98.1608	9.53018	6.18	98.1608	9.53018	6.18	98.1608	9.53018	10.3574
13	13.39	83.6407	8.12046	7.21	83.6407	8.12046	7.21	83.6407	8.12046	8.82532
14	14.42	71.2685	6.91927	8.24	71.2685	6.91927	8.24	71.2685	6.91927	7.51986
15	15.45	60.7263	5.89576	9.27	60.7263	5.89576	9.27	60.7263	5.89576	6.40751
16	16.48	51.7436	5.02365	10.3	51.7436	5.02365	10.3	51.7436	5.02365	5.4597	10.3	51.7436	5.02365	8.2364
17	17.51	44.0896	4.28054	11.33	44.0896	4.28054	11.33	44.0896	4.28054	4.6521	11.33	44.0896	4.28054	3.96395
18	18.54	37.5678	3.64736	12.36	37.5678	3.64736	12.36	37.5678	3.64736	3.96395	12.36	37.5678	3.64736	3.3776
19	19.57	32.0107	3.10784	13.39	32.0107	3.10784	13.39	32.0107	3.10784	3.3776	13.39	32.0107	3.10784	2.87798
20	20.6	27.2756	2.64812	14.42	27.2756	2.64812	14.42	27.2756	2.64812	2.87798	14.42	27.2756	2.64812	2.45226
21	21.63	23.241	2.25641	15.45	23.241	2.25641	15.45	23.241	2.25641	2.45226	15.45	23.241	2.25641	2.08952
22	22.66	19.8032	1.92264	16.48	19.8032	1.92264	16.48	19.8032	1.92264	2.08952	16.48	19.8032	1.92264	1.78044
23	23.69	16.8738	1.63824	17.51	16.8738	1.63824	17.51	16.8738	1.63824	1.78044	17.51	16.8738	1.63824	1.51707
24	24.72	14.3778	1.39591	18.54	14.3778	1.39591	18.54	14.3778	1.39591	1.51707	18.54	14.3778	1.39591	1.29266
25	25.75	12.251	1.18942	19.57	12.251	1.18942	19.57	12.251	1.18942	1.29266	19.57	12.251	1.18942	1.10145
26	26.78	10.4389	1.01348	20.6	10.4389	1.01348	20.6	10.4389	1.01348	1.10145	20.6	10.4389	1.01348	0.938523
27	27.81	8.89472	0.863565	21.63	8.89472	0.863565	21.63	8.89472	0.863565	0.938523	21.63	8.89472	0.863565	0.799695
28	28.84	7.579	0.735825	22.66	7.579	0.735825	22.66	7.579	0.735825	0.799695	22.66	7.579	0.735825	0.681403
29	29.87	6.45791	0.626981	23.69	6.45791	0.626981	23.69	6.45791	0.626981	0.681403	23.69	6.45791	0.626981	0.580609
30	30.9	5.50264	0.534237	24.72	5.50264	0.534237	24.72	5.50264	0.534237	0.580609	24.72	5.50264	0.534237	0.534237

## Sheet: Table 4b
Table 4b. Simulation outputs of erosion scenarios (H, J and K) in mangrove/tidal marsh sediments. Considering a constant flux of excess 210Pb of Φ = 120 Bq m-2 yr-1 and DBD: 0.4 g cm-3. Excess 210Pb concentrations in bold were used to run CF:CS and CRS models.
				Recent Erosion (H)			Past Erosion (I)				Past Erosion (J)
Depth (z)	Cum. Mass (m)	210Pbex (A)	210Pbex	Corrected cum. Mass (m)	210Pbex (A)	210Pbex (C)	Corrected cum. Mass (m)	210Pbex (A)	210Pbex (C)	Smoothed 210Pbex (C)	Corrected cum. Mass (m)	210Pbex (A)	210Pbex (C)	Smoothed 210Pbex (C)
cm	g cm-2	Bq m-2	Bq kg-1	g cm-2	Bq m-2	Bq kg-1	g cm-2	Bq m-2	Bq kg-1	Bq kg-1	g cm-2	Bq m-2	Bq kg-1	Bq kg-1
1	0.4	156.727	39.1818				0.4	156.727	39.1818	38.3864	0.4	156.727	39.1818	38.3864
2	0.8	150.364	37.5911				0.8	150.364	37.5911	36.8281	0.8	150.364	37.5911	36.8281
3	1.2	144.26	36.065				1.2	144.26	36.065	35.333	1.2	144.26	36.065	35.333
4	1.6	138.404	34.6009				1.6	138.404	34.6009	32.1846	1.6	138.404	34.6009	33.8986
5	2	132.785	33.1962								2	132.785	33.1962	32.5224
6	2.4	127.394	31.8486								2.4	127.394	31.8486	31.2021
7	2.8	122.222	30.5556	0.4	122.222	30.5556					2.8	122.222	30.5556	29.9354
8	3.2	117.261	29.3152	0.8	117.261	29.3152					3.2	117.261	29.3152	28.7201
9	3.6	112.5	28.1251	1.2	112.5	28.1251					3.6	112.5	28.1251	26.161
10	4	107.933	26.9833	1.6	107.933	26.9833
11	4.4	103.551	25.8878	2	103.551	25.8878	2	103.551	25.8878	28.4419
12	4.8	99.3475	24.8369	2.4	99.3475	24.8369	2.4	99.3475	24.8369	24.3327
13	5.2	95.3143	23.8286	2.8	95.3143	23.8286	2.8	95.3143	23.8286	23.3449
14	5.6	91.4449	22.8612	3.2	91.4449	22.8612	3.2	91.4449	22.8612	22.3972
15	6	87.7325	21.9331	3.6	87.7325	21.9331	3.6	87.7325	21.9331	21.4879
16	6.4	84.1709	21.0427	4	84.1709	21.0427	4	84.1709	21.0427	20.6156	4	84.1709	21.0427	23.1187
17	6.8	80.7538	20.1885	4.4	80.7538	20.1885	4.4	80.7538	20.1885	19.7787	4.4	80.7538	20.1885	19.7787
18	7.2	77.4755	19.3689	4.8	77.4755	19.3689	4.8	77.4755	19.3689	18.9757	4.8	77.4755	19.3689	18.9757
19	7.6	74.3302	18.5826	5.2	74.3302	18.5826	5.2	74.3302	18.5826	18.2054	5.2	74.3302	18.5826	18.2054
20	8	71.3126	17.8282	5.6	71.3126	17.8282	5.6	71.3126	17.8282	17.4663	5.6	71.3126	17.8282	17.4663
21	8.4	68.4176	17.1044	6	68.4176	17.1044	6	68.4176	17.1044	16.7572	6	68.4176	17.1044	16.7572
22	8.8	65.6401	16.41	6.4	65.6401	16.41	6.4	65.6401	16.41	16.0769	6.4	65.6401	16.41	16.0769
23	9.2	62.9753	15.7438	6.8	62.9753	15.7438	6.8	62.9753	15.7438	15.4242	6.8	62.9753	15.7438	15.4242
24	9.6	60.4187	15.1047	7.2	60.4187	15.1047	7.2	60.4187	15.1047	14.7981	7.2	60.4187	15.1047	14.7981
25	10	57.9659	14.4915	7.6	57.9659	14.4915	7.6	57.9659	14.4915	14.1973	7.6	57.9659	14.4915	14.1973
26	10.4	55.6127	13.9032	8	55.6127	13.9032	8	55.6127	13.9032	13.621	8	55.6127	13.9032	13.621
27	10.8	53.355	13.3387	8.4	53.355	13.3387	8.4	53.355	13.3387	13.068	8.4	53.355	13.3387	13.068
28	11.2	51.1889	12.7972	8.8	51.1889	12.7972	8.8	51.1889	12.7972	12.5375	8.8	51.1889	12.7972	12.5375
29	11.6	49.1108	12.2777	9.2	49.1108	12.2777	9.2	49.1108	12.2777	12.0285	9.2	49.1108	12.2777	12.0285
30	12	47.1171	11.7793	9.6	47.1171	11.7793	9.6	47.1171	11.7793	11.5402	9.6	47.1171	11.7793	11.5402
31	12.4	45.2043	11.3011	10	45.2043	11.3011	10	45.2043	11.3011	11.0717	10	45.2043	11.3011	11.0717
32	12.8	43.3692	10.8423	10.4	43.3692	10.8423	10.4	43.3692	10.8423	10.6222	10.4	43.3692	10.8423	10.6222
33	13.2	41.6085	10.4021	10.8	41.6085	10.4021	10.8	41.6085	10.4021	10.191	10.8	41.6085	10.4021	10.191
34	13.6	39.9193	9.97983	11.2	39.9193	9.97983	11.2	39.9193	9.97983	9.77726	11.2	39.9193	9.97983	9.77726
35	14	38.2987	9.57469	11.6	38.2987	9.57469	11.6	38.2987	9.57469	9.38034	11.6	38.2987	9.57469	9.38034
36	14.4	36.7439	9.18598	12	36.7439	9.18598	12	36.7439	9.18598	8.99952	12	36.7439	9.18598	8.99952
37	14.8	35.2523	8.81306	12.4	35.2523	8.81306	12.4	35.2523	8.81306	8.63417	12.4	35.2523	8.81306	8.63417
38	15.2	33.8211	8.45528	12.8	33.8211	8.45528	12.8	33.8211	8.45528	8.28365	12.8	33.8211	8.45528	8.28365
39	15.6	32.4481	8.11203	13.2	32.4481	8.11203	13.2	32.4481	8.11203	7.94736	13.2	32.4481	8.11203	7.94736
40	16	31.1308	7.7827	13.6	31.1308	7.7827	13.6	31.1308	7.7827	7.62473	13.6	31.1308	7.7827	7.62473
41	16.4	29.867	7.46675	14	29.867	7.46675	14	29.867	7.46675	7.31519	14	29.867	7.46675	7.31519
42	16.8	28.6545	7.16363	14.4	28.6545	7.16363	14.4	28.6545	7.16363	7.01822	14.4	28.6545	7.16363	7.01822
43	17.2	27.4912	6.87281	14.8	27.4912	6.87281	14.8	27.4912	6.87281	6.7333	14.8	27.4912	6.87281	6.7333
44	17.6	26.3752	6.59379	15.2	26.3752	6.59379	15.2	26.3752	6.59379	6.45995	15.2	26.3752	6.59379	6.45995
45	18	25.3044	6.32611	15.6	25.3044	6.32611	15.6	25.3044	6.32611	6.1977	15.6	25.3044	6.32611	6.1977
46	18.4	24.2771	6.06929	16	24.2771	6.06929	16	24.2771	6.06929	5.94609	16	24.2771	6.06929	5.94609
47	18.8	23.2916	5.82289	16.4	23.2916	5.82289	16.4	23.2916	5.82289	5.7047	16.4	23.2916	5.82289	5.7047
48	19.2	22.346	5.5865	16.8	22.346	5.5865	16.8	22.346	5.5865	5.47311	16.8	22.346	5.5865	5.47311
49	19.6	21.4388	5.35971	17.2	21.4388	5.35971	17.2	21.4388	5.35971	5.25092	17.2	21.4388	5.35971	5.25092
50	20	20.5685	5.14212	17.6	20.5685	5.14212	17.6	20.5685	5.14212	5.03775	17.6	20.5685	5.14212	5.03775
51	20.4	19.7335	4.93337	18	19.7335	4.93337	18	19.7335	4.93337	4.83323	18	19.7335	4.93337	4.83323
52	20.8	18.9324	4.73309	18.4	18.9324	4.73309	18.4	18.9324	4.73309	4.63702	18.4	18.9324	4.73309	4.63702
53	21.2	18.1638	4.54094	18.8	18.1638	4.54094	18.8	18.1638	4.54094	4.44877	18.8	18.1638	4.54094	4.44877
54	21.6	17.4264	4.3566	19.2	17.4264	4.3566	19.2	17.4264	4.3566	4.26816	19.2	17.4264	4.3566	4.26816
55	22	16.7189	4.17973	19.6	16.7189	4.17973	19.6	16.7189	4.17973	4.09489	19.6	16.7189	4.17973	4.09489
56	22.4	16.0402	4.01005	20	16.0402	4.01005	20	16.0402	4.01005	3.92865	20	16.0402	4.01005	3.92865
57	22.8	15.389	3.84725	20.4	15.389	3.84725	20.4	15.389	3.84725	3.76916	20.4	15.389	3.84725	3.76916
58	23.2	14.7643	3.69107	20.8	14.7643	3.69107	20.8	14.7643	3.69107	3.61615	20.8	14.7643	3.69107	3.61615
59	23.6	14.1649	3.54122	21.2	14.1649	3.54122	21.2	14.1649	3.54122	3.46934	21.2	14.1649	3.54122	3.46934
60	24	13.5898	3.39746	21.6	13.5898	3.39746	21.6	13.5898	3.39746	3.3285	21.6	13.5898	3.39746	3.3285
61	24.4	13.0381	3.25953	22	13.0381	3.25953	22	13.0381	3.25953	3.19337	22	13.0381	3.25953	3.19337
62	24.8	12.5088	3.12721	22.4	12.5088	3.12721	22.4	12.5088	3.12721	3.06373	22.4	12.5088	3.12721	3.06373
63	25.2	12.001	3.00025	22.8	12.001	3.00025	22.8	12.001	3.00025	2.93935	22.8	12.001	3.00025	2.93935
64	25.6	11.5138	2.87845	23.2	11.5138	2.87845	23.2	11.5138	2.87845	2.82003	23.2	11.5138	2.87845	2.82003
65	26	11.0464	2.7616	23.6	11.0464	2.7616	23.6	11.0464	2.7616	2.70554	23.6	11.0464	2.7616	2.70554
66	26.4	10.5979	2.64949	24	10.5979	2.64949	24	10.5979	2.64949	2.59571	24	10.5979	2.64949	2.59571
67	26.8	10.1677	2.54193	24.4	10.1677	2.54193	24.4	10.1677	2.54193	2.49033	24.4	10.1677	2.54193	2.49033
68	27.2	9.75493	2.43873	24.8	9.75493	2.43873	24.8	9.75493	2.43873	2.38923	24.8	9.75493	2.43873	2.38923
69	27.6	9.35891	2.33973	25.2	9.35891	2.33973	25.2	9.35891	2.33973	2.29223	25.2	9.35891	2.33973	2.29223
70	28	8.97897	2.24474	25.6	8.97897	2.24474	25.6	8.97897	2.24474	2.19918	25.6	8.97897	2.24474	2.19918
71	28.4	8.61445	2.15361	26	8.61445	2.15361	26	8.61445	2.15361	2.1099	26	8.61445	2.15361	2.1099
72	28.8	8.26473	2.06618	26.4	8.26473	2.06618	26.4	8.26473	2.06618	2.02424	26.4	8.26473	2.06618	2.02424
73	29.2	7.92921	1.9823	26.8	7.92921	1.9823	26.8	7.92921	1.9823	1.94207	26.8	7.92921	1.9823	1.94207
74	29.6	7.60731	1.90183	27.2	7.60731	1.90183	27.2	7.60731	1.90183	1.86322	27.2	7.60731	1.90183	1.86322
75	30	7.29848	1.82462	27.6	7.29848	1.82462	27.6	7.29848	1.82462	1.78758	27.6	7.29848	1.82462	1.78758
76	30.4	7.00218	1.75055	28	7.00218	1.75055	28	7.00218	1.75055	1.71501	28	7.00218	1.75055	1.71501
77	30.8	6.71792	1.67948	28.4	6.71792	1.67948	28.4	6.71792	1.67948	1.64539	28.4	6.71792	1.67948	1.64539
78	31.2	6.44519	1.6113	28.8	6.44519	1.6113	28.8	6.44519	1.6113	1.57859	28.8	6.44519	1.6113	1.57859
79	31.6	6.18354	1.54588	29.2	6.18354	1.54588	29.2	6.18354	1.54588	1.51451	29.2	6.18354	1.54588	1.51451
80	32	5.93251	1.48313	29.6	5.93251	1.48313	29.6	5.93251	1.48313	1.45302	29.6	5.93251	1.48313	1.45302
81	32.4	5.69167	1.42292	30	5.69167	1.42292	30	5.69167	1.42292	1.39403	30	5.69167	1.42292	1.39403
82	32.8	5.4606	1.36515	30.4	5.4606	1.36515	30.4	5.4606	1.36515	1.33744	30.4	5.4606	1.36515	1.33744
83	33.2	5.23892	1.30973	30.8	5.23892	1.30973	30.8	5.23892	1.30973	1.28315	30.8	5.23892	1.30973	1.28315
84	33.6	5.02624	1.25656	31.2	5.02624	1.25656	31.2	5.02624	1.25656	1.23105	31.2	5.02624	1.25656	1.23105
85	34	4.82219	1.20555	31.6	4.82219	1.20555	31.6	4.82219	1.20555	1.18108	31.6	4.82219	1.20555	1.18108
86	34.4	4.62642	1.15661	32	4.62642	1.15661	32	4.62642	1.15661	1.13313	32	4.62642	1.15661	1.13313
87	34.8	4.43861	1.10965	32.4	4.43861	1.10965	32.4	4.43861	1.10965	1.08713	32.4	4.43861	1.10965	1.08713
88	35.2	4.25841	1.0646	32.8	4.25841	1.0646	32.8	4.25841	1.0646	1.04299	32.8	4.25841	1.0646	1.04299
89	35.6	4.08554	1.02138	33.2	4.08554	1.02138	33.2	4.08554	1.02138	1.00065	33.2	4.08554	1.02138	1.00065
90	36	3.91968	0.979919	33.6	3.91968	0.979919	33.6	3.91968	0.979919	0.960029	33.6	3.91968	0.979919	0.960029
91	36.4	3.76055	0.940138	34	3.76055	0.940138	34	3.76055	0.940138	0.921055	34	3.76055	0.940138	0.921055
92	36.8	3.60789	0.901971	34.4	3.60789	0.901971	34.4	3.60789	0.901971	0.883663	34.4	3.60789	0.901971	0.883663
93	37.2	3.46142	0.865354	34.8	3.46142	0.865354	34.8	3.46142	0.865354	0.847789	34.8	3.46142	0.865354	0.847789
94	37.6	3.32089	0.830224	35.2	3.32089	0.830224	35.2	3.32089	0.830224	0.813371	35.2	3.32089	0.830224	0.813371
95	38	3.18608	0.796519	35.6	3.18608	0.796519	35.6	3.18608	0.796519	0.780351	35.6	3.18608	0.796519	0.780351
96	38.4	3.05673	0.764183	36	3.05673	0.764183	36	3.05673	0.764183	0.748672	36	3.05673	0.764183	0.748672
97	38.8	2.93264	0.73316	36.4	2.93264	0.73316	36.4	2.93264	0.73316	0.718278	36.4	2.93264	0.73316	0.718278
98	39.2	2.81358	0.703396	36.8	2.81358	0.703396	36.8	2.81358	0.703396	0.689118	36.8	2.81358	0.703396	0.689118
99	39.6	2.69936	0.67484	37.2	2.69936	0.67484	37.2	2.69936	0.67484	0.661142	37.2	2.69936	0.67484	0.661142
100	40	2.58978	0.647444	37.6	2.58978	0.647444	37.6	2.58978	0.647444	0.634302	37.6	2.58978	0.647444	0.634302
101	40.4	2.48464	0.62116	38	2.48464	0.62116	38	2.48464	0.62116	0.608551	38	2.48464	0.62116	0.608551
102	40.8	2.38377	0.595943	38.4	2.38377	0.595943	38.4	2.38377	0.595943	0.583846	38.4	2.38377	0.595943	0.583846
103	41.2	2.287	0.57175	38.8	2.287	0.57175	38.8	2.287	0.57175	0.560144	38.8	2.287	0.57175	0.560144
104	41.6	2.19415	0.548538	39.2	2.19415	0.548538	39.2	2.19415	0.548538	0.537404	39.2	2.19415	0.548538	0.537404
105	42	2.10508	0.52627	39.6	2.10508	0.52627	39.6	2.10508	0.52627	0.515587	39.6	2.10508	0.52627	0.515587
106	42.4	2.01962	0.504905	40	2.01962	0.504905	40	2.01962	0.504905	0.494656	40	2.01962	0.504905	0.494656
107	42.8	1.93763	0.484407	40.4	1.93763	0.484407	40.4	1.93763	0.484407	0.474575	40.4	1.93763	0.484407	0.474575
108	43.2	1.85897	0.464742	40.8	1.85897	0.464742	40.8	1.85897	0.464742	0.455308	40.8	1.85897	0.464742	0.455308
109	43.6	1.7835	0.445875	41.2	1.7835	0.445875	41.2	1.7835	0.445875	0.436824	41.2	1.7835	0.445875	0.436824
110	44	1.7111	0.427774	41.6	1.7111	0.427774	41.6	1.7111	0.427774	0.419091	41.6	1.7111	0.427774	0.419091
111	44.4	1.64163	0.410408	42	1.64163	0.410408	42	1.64163	0.410408	0.402077	42	1.64163	0.410408	0.402077
112	44.8	1.57499	0.393746	42.4	1.57499	0.393746	42.4	1.57499	0.393746	0.385754	42.4	1.57499	0.393746	0.385754
113	45.2	1.51105	0.377762	42.8	1.51105	0.377762	42.8	1.51105	0.377762	0.377762	42.8	1.51105	0.377762	0.377762

## Sheet: Table 5a
Table 5a. Simulation outputs of excess 210Pb concentrations diluted by coarse grains size sediment composition in seagrass sediments (scenario K). Considering a mean MAR = 0.2 g cm-2 yr-1, mean specific surface area of the bulk sediment of Smean = 0.007 m2 g-1 and a DBD = 1.03 g cm-3 that in this case is estimated as the weighted average of the DBD of the two mixed grain size fractions.
Depth (z)	Cum. Mass (m)	210Pbex (A)	210Pbex (C)	m	Diluted 210Pbex	Coarse cum. Mass (m)
cm	g cm-2	Bq m-2	Bq kg-1	mBq m-2	Bq kg-1	g cm-2
1	1.03	571.034	55.4402	319.518	11.3624	1.026
2	2.06	486.566	47.2394	272.424	9.68764	2.052
3	3.09	414.593	40.2517	232.271	8.25976	3.078
4	4.12	353.265	34.2976	198.036	7.04234	4.104
5	5.15	301.01	29.2243	168.847	6.00436	5.13
6	6.18	256.484	24.9014	143.961	5.11937	6.156
7	7.21	218.545	21.2179	122.742	4.36481	7.182
8	8.24	186.217	18.0793	104.651	3.72148	8.208
9	9.27	158.672	15.405	89.2262	3.17296	9.234
10	10.3	135.201	13.1263	76.075	2.70529	10.26
11	11.33	115.202	11.1846	64.8622	2.30656	11.286
12	12.36	98.1608	9.53018	55.302	1.96659	12.312
13	13.39	83.6407	8.12046	47.151	1.67673	13.338
14	14.42	71.2685	6.91927	40.2013	1.42959	14.364
15	15.45	60.7263	5.89576	34.276	1.21888	15.39
16	16.48	51.7436	5.02365	29.224	1.03923	16.416
17	17.51	44.0896	4.28054	24.9166	0.886057	17.442
18	18.54	37.5678	3.64736	21.2441	0.75546	18.468
19	19.57	32.0107	3.10784	18.1129	0.644111	19.494
20	20.6	27.2756	2.64812	15.4432	0.549175	20.52
21	21.63	23.241	2.25641	13.167	0.468231	21.546
22	22.66	19.8032	1.92264	11.2263	0.399218	22.572
23	23.69	16.8738	1.63824	9.57165	0.340376	23.598
24	24.72	14.3778	1.39591	8.19076		24.624
25	25.75	12.251	1.18942	6.98351		25.65
26	26.78	10.4389	1.01348	5.9542		26.676
27	27.81	8.89472	0.863565	5.0766		27.702
28	28.84	7.579	0.735825	4.32835		28.728
29	29.87	6.45791	0.626981	3.69039		29.754
30	30.9	5.50264	0.534237	3.14646		30.78

[truncated: 5 more sheets: Table 5b, Table 6a, Table 6b, Table 7a, Table 7b]
